# Supplementary material for: A metadata approach to evaluate the state of ocean knowledge: Strengths, limitations, and application to Mexico
Source: PLoS One. 2019 Jun 12;14(6):e0216723. doi: 10.1371/journal.pone.0216723 (PMC6561630; doi:10.1371/journal.pone.0216723)
Supplement: S2 Table — This list includes host institutions where we held (or participated in) workshops, meetings or presentations related to the metadata repository and compilation. Events organized by the authors were open invitations and Attendees shows the estimated number of people at each session. (CSV) [file pone.0216723.s002.csv]

Date	Host	Host Type	Attendees	Location	Lat	Long
January, 2017	EDF	CSO	100	Merida	21.5	-89.6262725
January, 2017	EDF	CSO	100	La_Paz	24.1164209	-110.3727669
January, 2017	FMCN	CSO	1	La_Paz	24.1164209	-110.3727669
March, 2017	SGM	International	150	Houston	29.8168824	-95.6814755
March, 2017	UABCS	Academic	10	La_Paz	24.103562	-110
March, 2017	IPN-CICIMAR	Academic	20	La_Paz	24.1403899	-110
March, 2017	NAAFE	Academic	100	La_Paz	24.1164209	-110
March, 2017	COBI	CSO	5	La_Paz	27.9179	-110.9089
March, 2017	TNC	CSO	2	La_Paz	24.1164209	-110.3727669
March, 2017	NOS	CSO	1	La_Paz	24.1164209	-110.3727669
March, 2017	Niparaja	CSO	2	La_Paz	24.1164209	-110.3727669
March, 2017	GoMexSI	International	1	Houston	29.8168824	-95.6814755
March, 2017	INAPESCA	Goverment	3	Meixco_City	19.3757226	-99.161345
March, 2017	Pronatura	CSO	2	Ensenada	31.862115	-116.95
April, 2017	CICESE	Academic	20	Ensenada	31.873281	-116.666154
April, 2017	UABC	Academic	30	Ensenada	31.862115	-116.667672
April, 2017	dataMares	International	3	San_Diego	32.820441	-117.2592594
June, 2017	CONABIO	Goverment	10	Meixco_City	19.28	-99.188448
June, 2017	INECC	Goverment	11	Meixco_City	19.303256	-99.1768655
June, 2017	CONACyT	Goverment	1	Meixco_City	19.28	-99.188448
September, 2017	PSHSSA	Academic	25	Felipe_Carillo_Puerto	19.5788685	-88.0345181
September, 2017	CINVESTAV	Academic	20	Merida	21.0213286	-89.6290416
September, 2017	U. Marista	Academic	5	Merida	21.0516233	-89.6262725
September, 2017	UNAM-UAY	Academic	30	Sisal	21.164403	-90.0505587
October, 2017	UNAM-UAPM	Academic		Puerto Morelos	20.8506709	-86.8788284
